# Supplementary material
Source: MDPI journal article supplement (https://www.mdpi.com/2075-163X/9/6/377)
Supplement: s1 [file s1]

## Sheet: Mg isotopes
Sample No.	δ26Mg	2SD	δ25Mg	2SD	Sample description	δ26Mg	δ25Mg	Δ25Mg
Zhaoanzhuang iron deposit (this study)
GSB	-2.03136	0.0347957	-1.04952	0.0355908		-2.03342	-1.05007	0.00934251
AGV-2	-0.146356	0.0292422	-0.0603624	0.0131008		-0.146367	-0.0603642	0.0158929
BHVO-2	-0.25001	0.0403793	-0.114664	0.0361253		-0.250041	-0.114671	0.015601
ZAZ-11	-0.928181	0.0162484	-0.476208	0.0383873	Serpentine-magnetite ore	-0.928612	-0.476321	0.00748552
ZAZ-25	-0.799077	0.0231168	-0.40079	0.0086645	Altered olivine-orthopyroxenite	-0.799397	-0.400871	0.0156151
ZAZ13-12	-0.659752	0.0567814	-0.338013	0.0132158	Serpentine-magnetite ore	-0.659969	-0.33807	0.00577423
ZK3211-13	-0.342807	0.0259031	-0.180104	0.0129941	Amphibolite	-0.342866	-0.18012	-0.00148681
ZK3211-25	-1.2006	0.0579041	-0.623699	0.0300113	Anhydrite-serpentinite	-1.20132	-0.623893	0.001994
ZK3211-29	-0.660773	0.0356672	-0.343014	0.0136247	Magnetite-serpentinite	-0.660991	-0.343072	0.00130399
ZK3211-61	-1.00439	0.04408	-0.519577	0.011103	Carbonate-magnetite-serpentinite	-1.00489	-0.519712	0.0038375
Tieshanmiao iron deposit (unpublished data)
ZK3211-113	-1.98308	0.0458927	-1.0236	0.0341915	Marble	-1.98505	-1.02412	0.0100906
ZK3211-129	-1.67119	0.060259	-0.873277	0.0612404	Marble	-1.67258	-0.873658	-0.00224224
ZK3211-142	-1.89715	0.0480036	-0.978519	0.037298	Marble	-1.89895	-0.978998	0.0103574
ZK3211-148	-2.00106	0.0565457	-1.03917	0.0465867	Marble	-2.00307	-1.03971	0.0038872
ZK3211-175	-2.32224	0.00989973	-1.19933	0.0494515	Marble	-2.32494	-1.20005	0.0112437
ZK3211-147	-1.93416	0.0261214	-0.988164	0.040062	Tremolite	-1.93603	-0.988652	0.0200189
ZK3211-181	-1.92687	0.0498935	-0.991289	0.039898	Tremolite	-1.92873	-0.991781	0.0130871
ZK3211-177	-0.125057	0.042855	-0.0639295	0.0384034	Magnetite-pyroxenite	-0.125065	-0.0639316	0.00122728
TGK14-2	-1.54025	0.0243744	-0.778177	0.019669	Magnetite-pyroxenite	-1.54144	-0.77848	0.0246093
TGK14-5	-1.31905	0.0458635	-0.677807	0.0377128	Magnetite-pyroxenite	-1.31992	-0.678037	0.00964043
TGK14-7	-1.14597	0.0319496	-0.587559	0.0552448	Magnetite-pyroxenite	-1.14662	-0.587732	0.00965864
Recommended values for references
GSB		-2.04+/-0.06
AGV-2		-0.15+/-0.06
BHVO-2		-0.25+/-0.06
Dong et al., 2016	this study	not published	Bourdon et al., 2010; Yang et al., 2009；Zhao et al.,2017; Li et al., 2016		Young and Galy, 2004; Bourdon et al., 2010; Foster et al., 2010	Galy et al., 2002；Li Fang-bing et al., 2016	Galy et al., 2002； Geske et al., 2015; Huang et al.2015	Li Fang-Bing et al., 2016
Huaziyu Magnesite deposit	Zhaoanzhuang iron deposit (this study)	Tieshammiao iron deposit (unpunlished data)	Magmatic rocks（peridotite, basalt, granite）		Seawater	Limestone	Normal dolomite	Marlstone
Magnesite ores
-0.65	-0.928181	-1.98308	CFD(continental flood basalt)		-0.864	-4.088	-1.089	-2.06
-0.49	-0.799077	-1.67119	-0.25		-0.799	-4.472	-2.29	-1.94
-0.67	-0.659752	-1.89715	-0.23		-0.851	-2.65	-1.382	-2.17
-0.63	-0.342807	-2.00106	-0.22		-0.811	-2.75	-1.339	-1.99
-0.65	-1.2006	-2.32224	-0.16		-0.83	-2.89	-1.66	-2.21
-0.85	-0.660773	-1.93416	Peridotite (whole-rock)		-0.82	-2.53	Marine evaprtative dolomite	-2.14
-0.73	-1.00439	-1.92687	-0.19			-2.59	-2.49	-2.24
-0.74		-0.125057	-0.199			-3.11	-2.44	-2.53
-0.76		-1.54025	-0.253			-3.04	-1.99	-2.21
-0.77		-1.31905	-0.208			-2.9	-2.24	-2.26
-0.53		-1.14597	MORB			-3.21	-2.2	-2.38
-0.88			-0.186			-3.18	-2.2	-2.47
-1.53			-0.169			-3.15	-1.7	-2.68
-0.82			-0.235				-1.71	-2.39
-1.26			-0.14				-2.03	-2.17
-0.89			-0.254				-1.67	-1.85
-0.95			OIB				-2.05	-1.84
-0.88			-0.171				-2.28
-0.85			-0.267
-0.82			-0.234				Mixing zone dolomite
Dolomitic marble			-0.163				-1.86
-0.88			-0.273				-1.3
Thin magnetite ores			-0.18				-1.38
-1.14			-0.17				-1.1
-1.04			-0.243
-1.21			-0.207				Non-marine evaporative dolomite
-1.18			-0.293				-2.08
Dolomitic marble			-0.117				-1.89
-1.14			-0.242				-1.51
-1.07			-0.336				-1.06
-1.48			-0.274
-1.2			-0.351				Hydrothermal dolomite
			-0.34				-1.67
			-0.201				-2.22
			Peridotite (whole-rock)				-2.18
			-0.28				-0.45
			-0.26				-0.61
			-0.21				-1.74
			-0.27				-1.78
			-0.19				-0.91
			-0.26				-0.86
			-0.29				-1.96
			Pyroxenite (whole-rock)				Normal dolomite
			-0.28				-1.48
			-0.25				-1.72
			-0.26				-1.7
			-0.43	Garnet-websterite			-1.57
			-1.53	Phlogopite-pyroxenite			-1.67
			Carbonatite				-1.69
			-0.3				-1.46
			-0.26				-1.5
			-0.27				-1.49
			-0.1				-1.46
			-0.11				-1.43
			-0.17				-1.52
			-0.15				-1.49
			-0.04				-1.49
			0.08				-1.63
			0.1				-1.43
			-0.17				-1.46
			-0.16				-1.37
							-1.48
			Wang et al., 2014b				-1.41
			carbonated eclogite				-1.4
			-0.68				-1.35
			-0.65				-1.61
			-0.87				-1.42
			-0.68				-1.6
			-1.47				-1.39
			-1.54				-1.58
			-1.25
			-1.49
			-1.93
			Normal eclogite
			-0.278
			-0.296

## Sheet: S isotopes
Sample No.	Sample description	δ34Sv-CDT‰														D33SV-CDT				Wen et al., 2017
ZAZ-13	pyrite	11.5																		Types of ores		Region or district	δ34Sv-CDT‰		Comments	References
ZAZ-15	pyrite	13.9															∆33S=δ33S-1000((1+δ34S/1000）0.515-1)			Iron skarn		Handan-Xingtai, North China	14.0~18.6		Pyrite from the iron ores	Wen et al.(2017)
Sample No.	Sample description	δ34Sv-CDT‰	δ33Sv-CDT‰	D33SV-CDT	gypsum	anhydrite	calcite	lizardite	bayerite	magnesiohornblende	muscovite	zircon	talc
ZAZ14-06	gypsum	21.1	10.5	-0.3665	2.8	97.2								1.0211	1.01081	-0.311472				Iron skarn		Handan-Xingtai, North China	6.0~18.7		Numerous evaporite beds in Ordovician carbonates	Zhang and Ma (1996); Li et al. (2013a, b)
ZAZ14-07	gypsum	21.2	10.7	-0.218	42.3	57.7								1.0212	1.01086	-0.162452				Iron skarn		Linfen, North China	12.5~17.4		Numerous evaporite beds in Ordovician carbonates	Zhang et al. (2013a)
ZAZ14-10	gypsum	21.2	10.5	-0.418	100									1.0212	1.01086	-0.362452				Iron skarn		Laiwu, North China	5.0~18.0		Numerous evaporite beds in Ordovician carbonates	Yuan (1982)
ZAZ14-10repeat		21.4	10.6	-0.421										1.0214	1.01096	-0.364404				Iron skarn		Daye, South China	10.3~20		Abundant evaporites in Triassic carbonates	Zhu et al. (2013); Xie et al. (2015)
ZAZ14-11	gypsum	21.2	10.7	-0.218	100									1.0212	1.01086	-0.162452				Iron skarn		Cornwall, USA	5.8~19.9		Possible evaporites or sulfate-bearing pore fluids	Rose et al. (1985)
ZAZ14-11repeat		21.3	10.6	-0.3695										1.0213	1.01091	-0.313429				Iron skarn		North Sweden	﹣7.9~24.7		Evidence for evaporites or seawater sulfate	Frietsch et al. (1995)
ZAZ14-13	gypsum	21.3	10.8	-0.1695	85.6	5	3.8	5.6						1.0213	1.01091	-0.113429				Iron skarn		Colima, Mexico	4.5~6.1		Possible evaporites or trapped seawater sulfate	Zürcher et al. (2001)
ZAZ14-14	gypsum	21.8	11.3	0.073	100									1.0218	1.01117	0.13172				Iron skarn		Vegas Peladas, Argentina	No data		Extensive Jurassic evaporites	Pons et al. (2009)
ZAZ14-16	gypsum	22.5	11.5	-0.0875	48.4	51.6								1.0225	1.01152	-0.0249702				IOA		Ningwu, China	﹣2.5~22.8		Abundant evaporites in Triassic sedimentary sequence	Li et al. (2014); Li et al. (2015)
ZAZ14-18	gypsum	21	10.4	-0.415	98	2								1.021	1.01076	-0.36049				IOA		Luzong, South China	﹣9.3~14.3		Abundant evaporites in Triassic sedimentary sequence	Li et al. (2014)
ZAZ14-19	gypsum	22.5	11.2	-0.3875	100									1.0225	1.01152	-0.32497				IOA		Bafq, Iran	﹣2.1~30		Extensive Cambrian and younger evaporites or seawater sulfate	Jami (2005)
ZAZ14-21	gypsum	21	11.1	0.285	94.3	5.7								1.021	1.01076	0.33951				IOA		Kiruna, Sweden	No data		Evidence for evaporites of rifting sequence	Hitzman et al. (1992)
ZAZ14-23	gypsum	21.4	11	-0.021										1.0214	1.01096	0.0355956				IOCG		Kangdian, SW China	﹣3.8~15.9		Evaporites in Proterozoic rift sequence	Zhao and Zhou, (2011); Zhao (2010)
ZAZ14-24	gypsum	21	10.4	-0.415	98.8	1.2								1.021	1.01076	-0.36049				IOCG		Olympic Dam, Austrilia	﹣14~12.5		Possible involvement of metasedimentary sulfate or Proterozoic seawaters	Bastrakov et al. (2007) and references therein
ZAZ14-25	gypsum	21.3	11.1	0.1305	74.9	22.6	2.5							1.0213	1.01091	0.186571				IOCG		Mantoverde, Chile	﹣6.8~11.2		Evidence for incursion of modified seawater and evaporitic sediments	Benavides et al. (2007) and references therein
ZAZ14-25repeat		21.4	10.9	-0.121										1.0214	1.01096	-0.0644044				IOCG		Siberia, Russia	13.5~21		Evidence for evaporites	Vakhrushev et al. (1981)
ZAZ14-26	gypsum	21.4	11.3	0.279	98.1	1.9								1.0214	1.01096	0.335596
ZAZ14-27	gypsum	20.9	10.7	-0.0635	100									1.0209	1.01071	-0.00950504
ZAZ14-29	gypsum	20.7	10.9	0.2395	100									1.0207	1.01061	0.292472
ZAZ14-30	gypsum	19.8	9.8	-0.397										1.0198	1.01015	-0.348513
ZAZ14-35	gypsum	20	10.3	0	100									1.02	1.01025	0.0494665
ZAZ14-37	gypsum	21.3	14.2	3.2305	96.9			3.1						1.0213	1.01091	3.28657
ZAZ14-38	gypsum	20.3	11.3	0.8455	100									1.0203	1.0104	0.896454
ZAZ14-39	gypsum	21.2	11.6	0.682	68	30.2				1.8				1.0212	1.01086	0.737548
ZAZ14-40	gypsum	20	10.4	0.1	72.6	27.4								1.02	1.01025	0.149467
ZAZ14-40repeat		20	10.3	0										1.02	1.01025	0.0494665
ZAZ14-41	gypsum	20.1	10.3	-0.0515	67.1	32.9								1.0201	1.0103	-0.00154003
ZAZ14-42	gypsum	21.6	10.9	-0.224	100									1.0216	1.01107	-0.166347
ZAZ14-43	gypsum	21.3	11.3	0.3305	100									1.0213	1.01091	0.386571
ZAZ14-46	gypsum	21.1	11.1	0.2335	100									1.0211	1.01081	0.288528
ZAZ14-47	gypsum	20.8	11	0.288	97.1	2.9								1.0208	1.01066	0.341482
ZAZ14-49	gypsum	22.3	11.6	0.1155	88.6	11.4								1.0223	1.01142	0.176929
ZAZ14-54	gypsum	20.9	11	0.2365	100									1.0209	1.01071	0.290495
ZAZ14-55	gypsum	19.9	10.4	0.1515	92.7			0.7			6.6			1.0199	1.0102	0.200475
ZAZ14-57	gypsum	22.4	11	-0.536	100									1.0224	1.01147	-0.474022
ZAZ14-58	gypsum	20.6	10.6	-0.009	91						9			1.0206	1.01056	0.0434637
ZAZ14-60	gypsum	20.8	10.4	-0.312	99.1							0.9		1.0208	1.01066	-0.258518
ZAZ14-62	gypsum	20.5	10.2	-0.3575	100									1.0205	1.01051	-0.305542
ZAZ14-63	gypsum	20.8	10.4	-0.312	98.7								1.3	1.0208	1.01066	-0.258518

## Sheet: B isotopes
Zhaoanzhuang tourmaline (this study)
ZK2151-12	δ11B	ZK2151-23	δ11B	ZK2704-10	δ11B
1-1	2.61802	1-1	3.27921	1-4	1.90206
1-2	2.22048	1-2	0.209923	1-5	0.300903
1-3	0.164593	1-3	2.04373	1-6	0.189513
1-4	-0.217151	1-4	1.82652	1-7	0.669377
1-6	1.92088	1-5	3.08587	1-8	1.36132
1-7	1.39257	1-6	3.19743	1-9	3.60434
1-8	1.09454	1-7	3.33671	1-10	2.78106
1-9	1.16916	1-8	3.02412	1-11	3.43382
1-10	2.70792	1-9	2.29422	1-12	1.61467
1-11	3.16823	1-10	1.80621	mean	1.7619
1-12	2.6924	1-11	2.38536	maximum difference	3.2
1-13	1.76323	1-12	2.07021	1-1	-0.576317	lowsignal, possbily missing
mean	1.72457	mean	2.37996	1-2	-0.43108	lowsignal, possbily missing
maximum difference	3.4	maximum difference	3.1	1-3	-0.305145	lowsignal, possbily missing
Compilation of δ11B data		δ11B values of tourmaline in pegmatiite		δ11B values of tourmaline in the Archean evaporites from Barberton greenstone belt, South Africa		δ11B values of tourmaline in altered magmatic rocks		δ11B values of seawater		δ11B values of tourmaline in Zhaoanzhuang (this study)		δ11B values of tourmaline and borates from the Houxianyu borate deposit			The δ11B variation of tourmaline in the nature rocks
		-14.6	Trumbull et al., 2013	-0.2	Byerly and Palmer, 1991	21.6	Marschall et al., 2006	39.61	Foster et al., 2010	2.61802		9.7	tourmalinite	Peng and Palmer, 1995	-30	minimum value	Palmer and Slack, 1989; Swihart and Moore, 1989; Chaussidon and Albarede, 1992
		-13.9		-0.3		21.6				2.22048		9.4	tourmalinite		22	maximum value	Palmer and Slack, 1989; Swihart and Moore, 1989; Chaussidon and Albarede, 1992
		-14.9				21.7				0.164593		0.8	tourmaline in granite
		-20.2				21.8				-0.217151		10.9	borate ores
		-15.6		δ11B values of tourmaline in marine evaporite and carbonate-associated rocks	Palmer and Slack, 1989	19				1.92088		10.3	borate ores
		-13.9		-4.15		20.3				1.39257		10.2	borate ores
		-9		-8.13		21.2				1.09454
		-10.3		18.32		20.8				1.16916					The whole-rock δ11B values of some boron reservoirs
		-12.1		-3.63		22.2				2.70792		4.51	tourmalinite	Yan and Chen, 2014	-7.1	uncontaminated MORB	Marschall et al., 2017
		-15.9		10.47		21.4				3.16823		12.43	tourmalinite	Yan and Chen, 2014	-9.1	bulk continental crust	Marschall et al., 2017
		-16.4		6.65		20				2.6924					-9.9	primitive mantle	Chaussidon and Marty, 1995
		-14.9		-4.18		20				1.76323		9.5	tourmalinite	Yan and Chen, 2014
		-13.1		-7.35		18.8				3.27921		9.9	tourmalinite	Yan and Chen, 2014
		-11.6		1.56		18.3				0.209923
		-10.3		2.29		19.1				2.04373		δ11B values of the tourmaline from altered wall rocks in the Gongchangling high-grade iron ores (unpublished data, Wang Qian)
		-14.1		3.22		19.3				1.82652
		-15.1		δ11B values of tourmaline in non-marine evaporite	Slack et al., (1989)	28.4				3.08587		3.3	tourmalinite
		-12.6		-22.48		27.9				3.19743		7.3	tourmalinite
		-18.4		-18.98		28.3				3.33671
		-13.3		-12.29		21.9				3.02412		14.5	tourmalinite
		-13.6		-19.71						2.29422		17	tourmalinite
		-4.8		-20.83						1.80621
		-5.5		-17.92						2.38536
		-15.1		-17.23						2.07021
		-8.8		-22.79						1.90206
		-11.3		-21.88						0.300903
		-14.6		δ11B values of tourmaline in clastic sediment	Slack et al., (1989)					0.189513
		-6		-14.17						0.669377
		1.6		-13.05						1.36132
		-14.1		-13.88						3.60434
				-15.37						2.78106
				-2.19						3.43382
				-5.54						1.61467
				-6.56
				-2.85
				-8.14
				-13.71
				-10.52
				-5.17
				-13.82
				-8.14
				-8.22
				-7.74
				-12.11
				-11.94
				-11.32
				-10.32
				-2.78
				-13.02
				δ11B values of tourmaline in metavolcanic	Slack et al., (1989)
				-1.49
				-2.05
				-4.72
				-13.56
				-10.09
				-6.11
				-15.17
				-15.27
				-15.71
				-10.62
				-9.39
				-9.75
				-12.32
				-1.92
				-1.63
				-2.51
				-13.24

## Sheet: B contents
Sample No.	B(×10-6）	Sample description
ZK3211-22	197.453	anhydrite-phlogopite-serpentinite
ZK3211-26	64.9557	banded anhydrite-magnetite-serpentinite
ZK3211-27	92.3732	apatite-anhydrite-serpentine-magnetite
ZK3211-29	141.348	banded anhydrite-magnetite-serpentinite
ZK3211-50	81.6111	serpentinized (olivine-)orthopyroxenite
ZK3211-52	167.187	olivine-humite-orthopyroxenite
ZK3211-62	91.5406	olivine-orthopyroxenite
ZK3211-63	100.188	olivine-amphibolite
Analytical methods
The B content analysis was done in the state key laboratory for mineral deposits research, Nanjing University. At first, the samples were crushed into 200 mesh. Then the prepared powder samples were completely dissolved using HF-HNO3-HCl acid solutions. In favor of dissolving a mass of magnetite in some samples, the dosage ratio of HCl : HNO3 is set as 2:1. Following, the B contents were measured…
